# Supplementary material for: Antagonistic cotranscriptional regulation through ARGONAUTE1 and the THO/TREX complex orchestrates FLC transcriptional output
Source: PubMed Central journal article supplement (PMC8617408; doi:10.1073/pnas.2113757118), 2021-11-17
Supplement: pnas.2113757118.sapp.pdf [file pnas.2113757118.sapp.pdf]

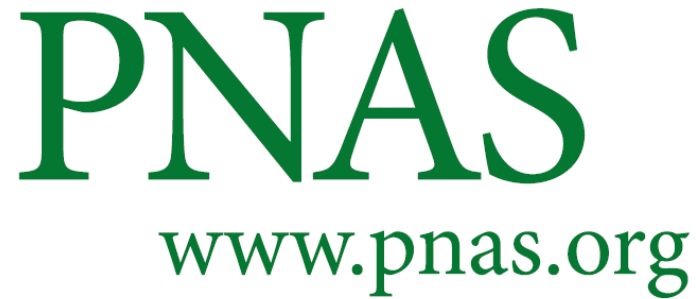

**Supplementary Information for**  
Antagonistic co-transcriptional regulation through ARGONAUTE1 and  
the THO/TREX complex orchestrates *FLC* transcriptional output

Congyao Xu<sup>a</sup>, Xiaofeng Fang<sup>a,b</sup>, Tiancong Lu<sup>a</sup> and Caroline Dean<sup>a\*</sup>.

\*Corresponding author: Caroline Dean.

**Email:** caroline.dean@jic.ac.uk

**This PDF file includes:**

Figures S1 to S10  
Table S1  
Legend for Dataset S1

**Other supplementary materials for this manuscript include the following:**

Dataset S1

|           |    | Total protein native IP |      | Nuclear protein crosslinked IP |      |
|-----------|----|-------------------------|------|--------------------------------|------|
|           |    | SDG26                   | AGO1 | SDG26                          | AGO1 |
| Col-0     | #1 | 0                       | 0    | 0                              | 0    |
|           | #2 | 0                       | 0    | 0                              | 0    |
| SDG26-GFP | #1 | 9                       | 14   | 108                            | 1    |
|           | #2 | 23                      | 11   | 115                            | 3    |
| GFP       |    | 0                       | 0    | 0                              | 0    |

**Figure. S1.** AGO1 co-immunoprecipitates with SDG26-GFP. Table listing the number of unique peptides of SDG26 and AGO1 identified in SDG26-GFP total protein native purification and crosslinked IP. Wildtype Col-0 and a transgenic line expressing *GFP* alone were included as negative controls.

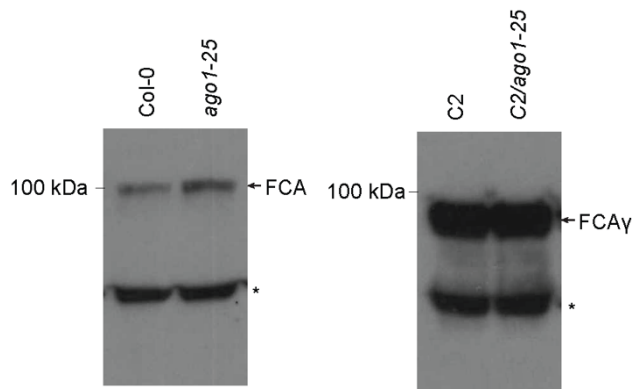

**Figure. S2.** Endogenous FCA or FCA  $\gamma$  protein level is not affected by *ago1-25*. FCA and FCA  $\gamma$  protein level in various genotypes determined by western blot analysis. The asterisk indicates non-specific signal.

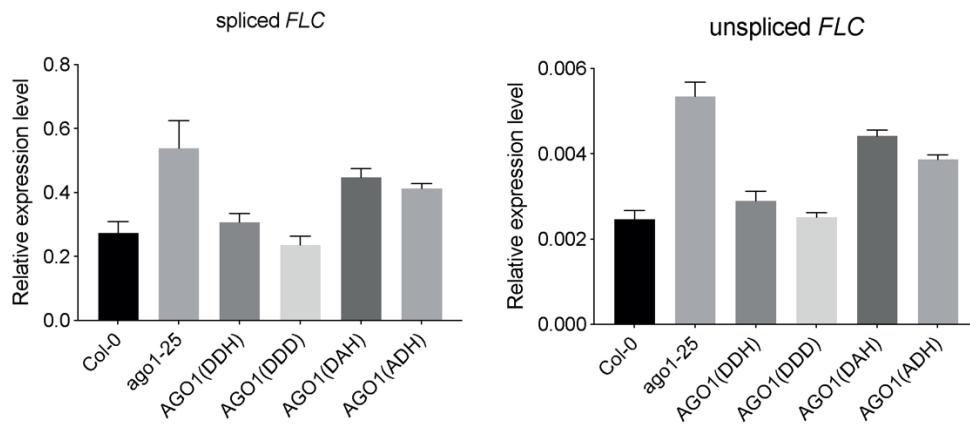

**Figure. S3.** Expression of spliced and unspliced *FLC* relative to *UBC* in various genotypes. AGO1(DDH) and AGO1(DDD) represent wildtype slicer. AGO1(DAH) and AGO1(ADH) represent deficient slicer. All of these lines are in *ago1-25* background. Data are presented as the mean  $\pm$  s.e.m (n = 3).

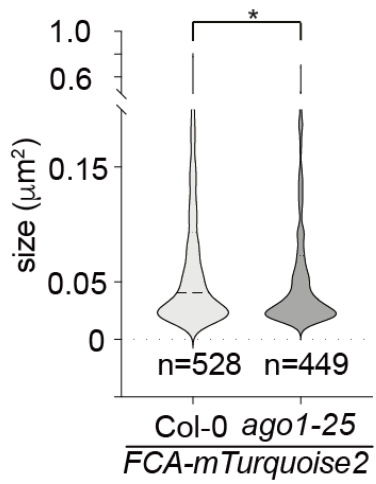

**Figure. S4.** The size distribution of FCA-mTurquoise2 condensates in the roots of Col-0 and *ago1-25* seedlings with the same copies of FCA-mTurquoise2 transgene. Asterisks indicate significant differences between the two groups (\* $P \leq 0.0178$ , two-tailed *t* test).

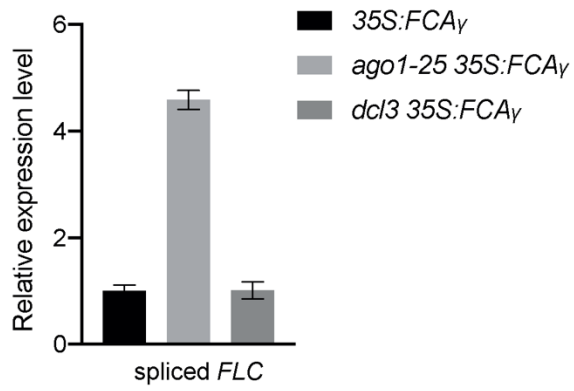

**Figure. S5.** DCL3 is not required for FCA mediated *FLC* silencing. Expression of spliced *FLC* relative to *UBC* in various genotypes. Data are presented as the mean  $\pm$  s.e.m (n = 3).

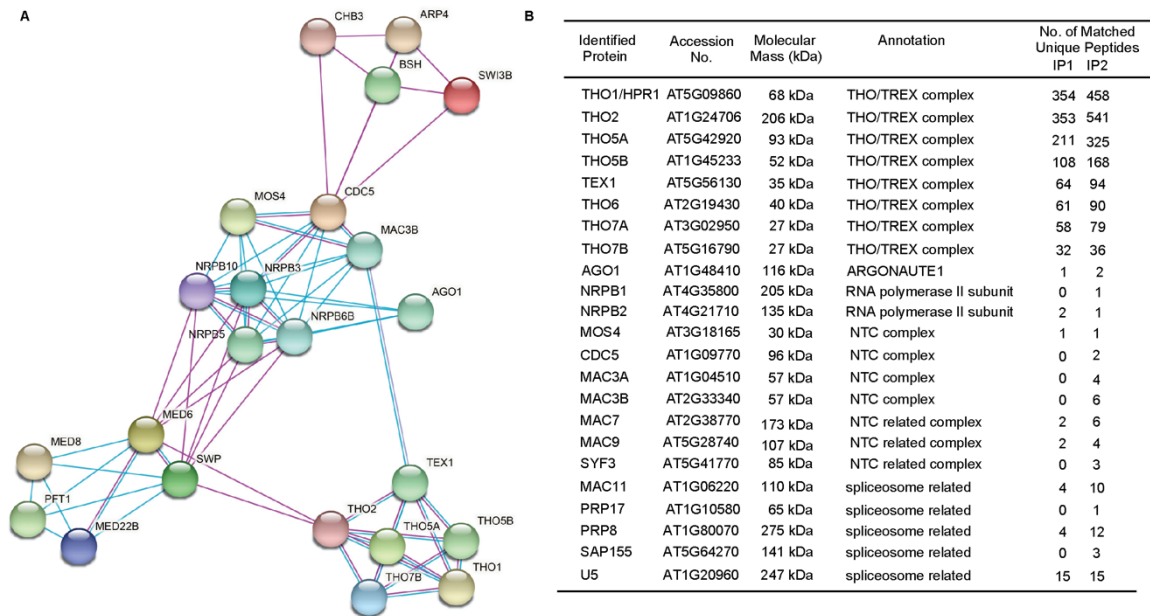

**Figure. S6.** Physical associations between AGO1, NTC/NTR, THO/TREX and RNA Pol II. (A) String analysis of nuclear AGO1 interactors. (B) Table listing the number of unique peptides of proteins identified in HPR1-GFP native immunoprecipitation. Col-0 was used as a negative control.

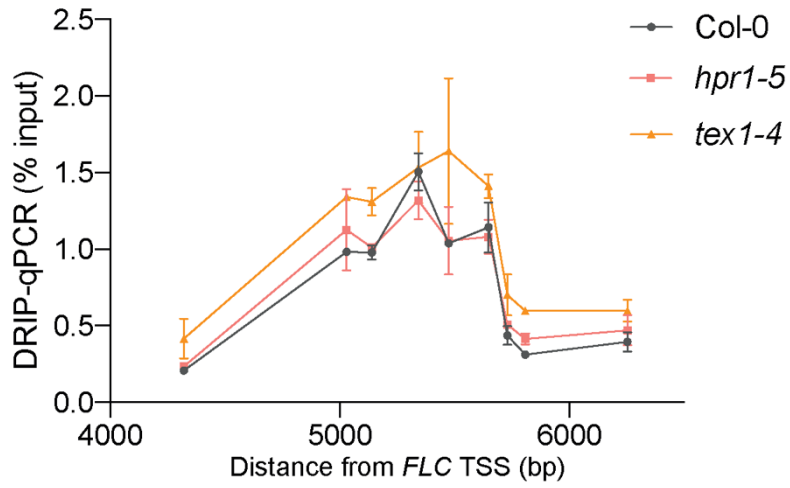

**Figure. S7.** *COOLAIR* R-loop is not affected in THO/TREX mutants. DRIP-qPCR determining R-loop level in various genotypes. The number on x axis is the distance to *FLC* TSS. Data are mean  $\pm$  s.e.m.(n=3).



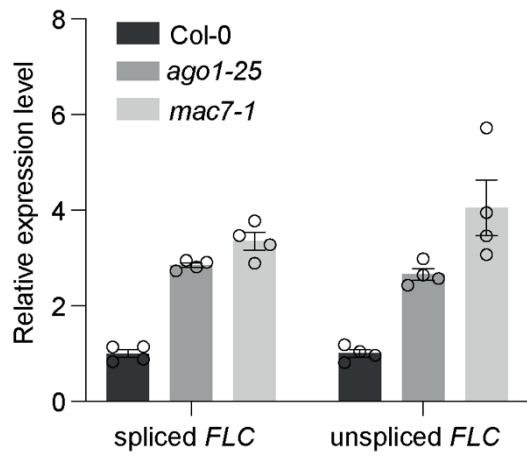

**Figure. S8.** MAC7 is required for *FLC* repression. Expression of spliced and unspliced *FLC* relative to *UBC* in various genotypes. Data are presented as the mean  $\pm$  s.e.m ( $n = 4$ ).

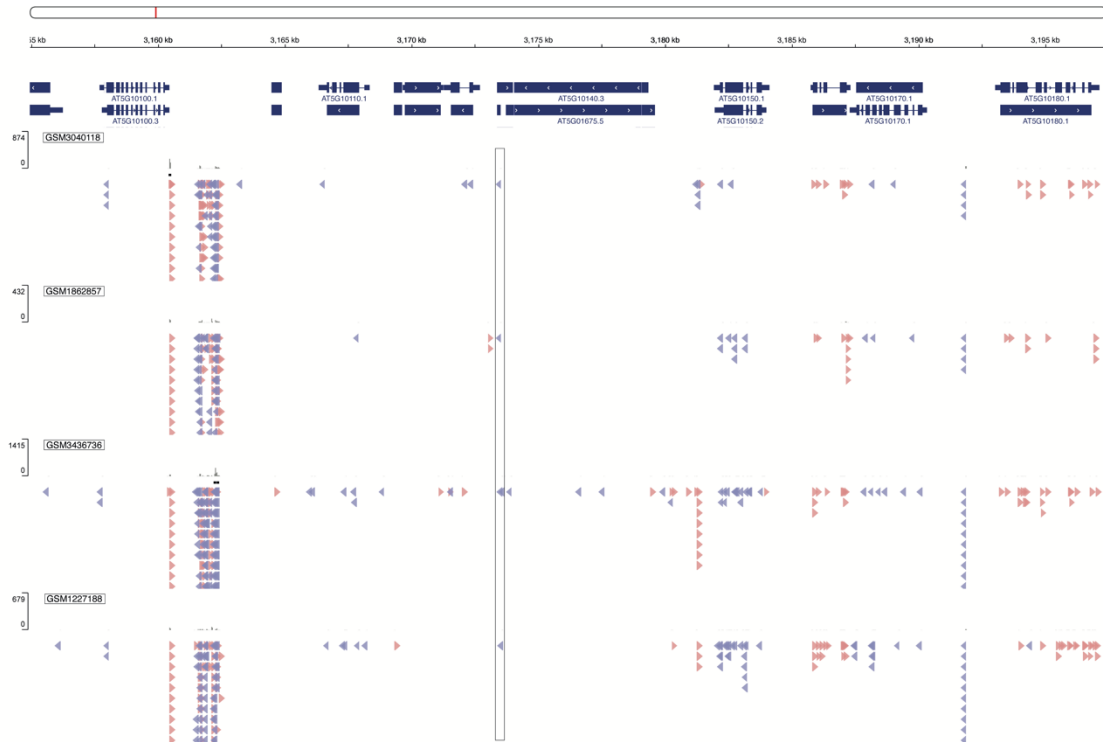

**Figure. S9.** A snapshot of sRNA over the *FLC* locus (AT5G10140) from sRNA sequencing databases. The rectangle in the middle marks the sRNA reads complementary to *COOLAIR* (AT5G01675) from four different published databases.

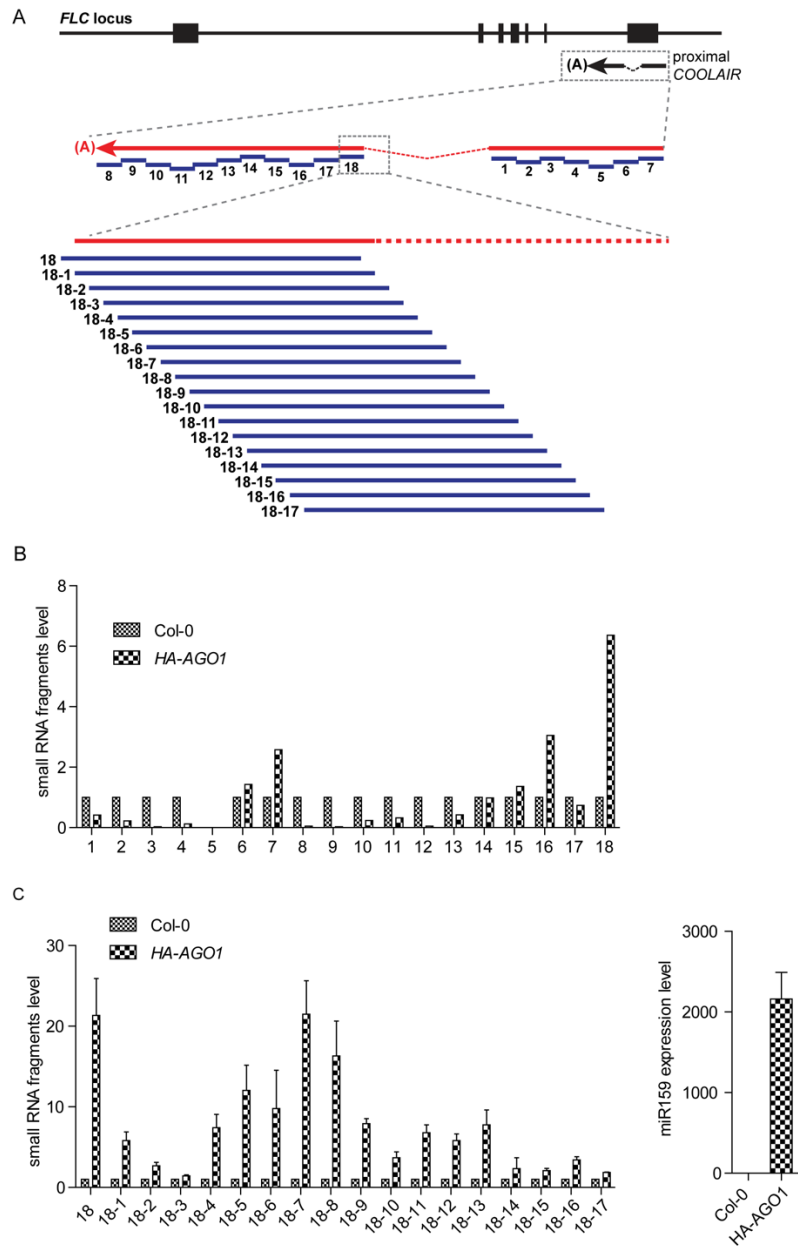

**Figure. S10.** Small RNA fragments complementary to *COOLAIR* were enriched over proximal *COOLAIR* intron/exon junction region. (A) A schematic of small RNA fragments mapping over the proximal *COOLAIR* transcript. Navy bars represent forward primers used for cDNA synthesis (see Materials and Methods). Red parts in the schematic represent enlargements of the grey boxes with dashed lines. (B) A rough mapping of small RNA fragments complementary to proximal *COOLAIR* based on RT-qPCR analysis. The positions of the forward primers for amplicons 1-18 refer to the schematic in (A). Data was normalized to Col-0. (C) A fine mapping of small RNA fragments complementary to proximal *COOLAIR* intron/exon junction region based on RT-qPCR analysis. The positions of the forward primers for amplicons 18 and 18-1 to 18-17 refer to the schematic in (A). miR159 expression level was included as a positive control. Data were normalized to Col-0. Data are mean  $\pm$  s.e.m.(n=3).

**Table S1. Primers used in this study.**

| Primers used for expression analysis           |                            |                  |
|------------------------------------------------|----------------------------|------------------|
| Primer position                                | Sequence 5'-3'             | Note             |
| UBC_F                                          | CTGGCACTCAGGGAATCTTCTAA    |                  |
| UBC_R                                          | TTGTGCCAATGAATTGAACCC      | for RT           |
| FLC_splced_F                                   | AGCCAAAGAACCGAAGCTCA       |                  |
| FLC_splced_R                                   | TTTGTCCAGCAGGTGACATC       | for RT           |
| FLC_unsplced_F                                 | CGCAATTTTCATAGCCCTTG       |                  |
| FLC_unsplced_R                                 | CTTTGTAATCAAGGTGGAGAGC     | for RT           |
| se2_F                                          | TCATCATGTGGGAGAGAAG        | proximal COOLAIR |
| se2_R                                          | TCTCACAGGAATAGGTGGGTA      |                  |
| se11_LP                                        | TGGTTGATTGGTGSTGTG         | for RT           |
| se4_F                                          | GTATCTGGGCACTTGAAC         | distal COOLAIR   |
| se4_R                                          | GGATCGCTCAGAGAACAG         |                  |
| FLC-158_F                                      | GCCCAGCAAGAAAAGTAG         | for RT           |
| Primers used for AGO1-HA RIP-qPCR              |                            |                  |
| Primer position (relative to FLC TSS)          | Sequence 5'-3'             | Note             |
| a_F                                            | CTGTCTCTGTGACGATCC         | for RT           |
| a_R                                            | AGGGGGACAAATGAAAACC        |                  |
| b_F                                            | AGTTTGGCTTCTCATACTATGG     | for RT           |
| b_R                                            | CAATGACCTTGAGGACAAGG       |                  |
| c_F                                            | TGAAATGTACGAATACTAGCGTGT   | for RT           |
| c_R                                            | GGATCAAACTACTAGCTAACCTTG   |                  |
| d_F                                            | AGAACACCGTGTGCTTTT         | for RT           |
| d_R                                            | TGTGTGGCTTCTCATACTATGG     |                  |
| e_F                                            | CCGGTTTGGGATAAAGTAG        | for RT           |
| e_R                                            | CCAAACCAGACTTAACAGAC       |                  |
| f_F                                            | GCTTCCAACCTTAAAGCTAAACA    | for RT           |
| f_R                                            | TCTTTTGTCTTCTATCCAGGAAT    |                  |
| g_F                                            | AGANTAGACTACTGCTCCAACT     | for RT           |
| g_R                                            | TTCAACACCAAAATAACAAC       |                  |
| h_F                                            | CACCTTAATCGCGGTTG          | for RT           |
| h_R                                            | TACAAACGCTGCCCTTATC        |                  |
| i_F                                            | GATATGAATATTCCCGTGATAAGG   | for RT           |
| i_R                                            | TCTTGGCCAGAGAGAGATATT      |                  |
| j_F                                            | CGTGTGAGAATTGCATCGAG       | for RT           |
| j_R                                            | AAAAACGGCAGAGAGAGAG        |                  |
| Primers used for ChIP (H3K4me1)                |                            |                  |
| Primer position (relative to FLC TSS)          | Sequence 5'-3'             | Note             |
| FLC -392_F                                     | ACTATGTAGGCAAGCTTTGGTAAAC  |                  |
| FLC -249_R                                     | TGCAGAAAGAACCTCCACTCTAC    |                  |
| FLC -49_F                                      | GCCCACGAGAAAAGTAG          |                  |
| FLC -88_R                                      | TTGAGTGGCCGAGAGATCT        |                  |
| FLC -581_F                                     | TTTGTTCATTCTCTCTCT         |                  |
| FLC -672_R                                     | AAACTCACTCAACAACATC        |                  |
| FLC -1533_F                                    | TTGACAACTCAGAACCTCAATC     |                  |
| FLC -1670_R                                    | TCAAATTCCTAGAGGCAACAA      |                  |
| FLC -2465_F                                    | AGTTTGGCTTCTCATACTATGG     |                  |
| FLC -2579_R                                    | CAATGACCTTGAGGACAAGG       |                  |
| FLC -3197_F                                    | GGGGCTGGCTTACATTTTA        |                  |
| FLC -3353_R                                    | GTGATAGCGTGGCTTTGAT        |                  |
| FLC -3643_F                                    | TGAAATGTACGAATACTAGCGTGT   |                  |
| FLC -3752_R                                    | GGATCAAACTACTAGCTAACCTTG   |                  |
| FLC -5030_F                                    | CCGGTTTGGGATAAAGTAG        |                  |
| FLC -5153_R                                    | CCAAACCAGACTTAACAGAC       |                  |
| FLC -5672_F                                    | CCTGCTGGAAATCTCCGA         |                  |
| FLC -6757_R                                    | GGATTTGATTTCAACCGCCGA      |                  |
| FLC -5970_F                                    | CGTGTGAGAATTGCATCGAG       |                  |
| FLC -6088_R                                    | AAAAACGGCAGAGAGAGAG        |                  |
| Primers used for HPR1-GFP RIP-qPCR (FLC)       |                            |                  |
| Primer position (relative to FLC TSS)          | Sequence 5'-3'             | Note             |
| I_F                                            | ATTAGGGCCAAAGCCCTCT        |                  |
| I_R                                            | CGACGTTGGAGAGGTTGAC        | for RT           |
| II_F                                           | AGCCAAAGAACCGAAGCTCA       |                  |
| II_R                                           | TTTGTCCAGCAGGTGACATC       | for RT           |
| III_F                                          | CCTGTGGAGAAATCTCCGA        |                  |
| III_R                                          | GGATTTGATTTCAACCGCCGA      | for RT           |
| IV_F                                           | GATATGAATATTCCCGTGATAAGG   |                  |
| IV_R                                           | TCTTGGCCAGAGAGAGATATT      | for RT           |
| Primers used for HPR1-GFP RIP-qPCR (COOLAIR)   |                            |                  |
| Primer position (relative to FLC TSS)          | Sequence 5'-3'             | Note             |
| 3643_F                                         | TGAAATGTACGAATACTAGCGTGT   | for RT           |
| 3752_R                                         | GGATCAAACTACTAGCTAACCTTG   |                  |
| 5030_F                                         | CCGGTTTGGGATAAAGTAG        | for RT           |
| 5153_R                                         | CCAAACCAGACTTAACAGAC       |                  |
| 5442_F                                         | GGATATAGACTACTAGCTCAACT    | for RT           |
| 5553_R                                         | TTCAACACCAAAATAACAAC       |                  |
| 5672_F                                         | CCTGCTGGAAATCTCCGA         | for RT           |
| 5757_R                                         | GGATTTGATTTCAACCGCCGA      |                  |
| 5792_F                                         | GATATGAATATTCCCGTGATAAGG   | for RT           |
| 5958_R                                         | TCTTGGCCAGAGAGAGATATT      |                  |
| 5948_F                                         | CGTGTGAGAATTGCATCGAG       | for RT           |
| 6088_R                                         | AAAAACGGCAGAGAGAGAG        |                  |
| 6096_F                                         | CTCTCTCTGGCGTTTTT          | for RT           |
| 6171_R                                         | ATTGGCCGAAATGTACCGA        |                  |
| Primers used for DRIP-qPCR                     |                            |                  |
| Primer position                                | Sequence 5'-3'             | Note             |
| FLC_4322_F                                     | AGAACACCGTGTGCTTTT         |                  |
| FLC_4469_R                                     | TGTGTGCAAGTCTTTAAGC        |                  |
| FLC_5342_F                                     | TTTTTGTAGGTTAGTTTGGGA      |                  |
| FLC_5411_R                                     | AGTAGCACTACTCTAGACACTTGGGA |                  |
| FLC_5472_F                                     | GCTTCCAACCTTAAAGCTTAAACA   |                  |
| FLC_5600_R                                     | TCTTTTGTCTTCTATCCAAGGAAT   |                  |
| FLC_5646_F                                     | TATTCATCATTTGGGAGAG        |                  |
| FLC_5727_R                                     | GGAGAGTCAAGGAGATTTG        |                  |
| FLC_5730_F                                     | CACCTTAATCGCGGTTG          |                  |
| FLC_5814_R                                     | TACAAACGCTGCCCTTATC        |                  |
| FLC_5948_F                                     | CGTGTGAGAATTGCATCGAG       |                  |
| FLC_6088_R                                     | AAAAACGGCAGAGAGAGAG        |                  |
| FLC_6768_F                                     | TTGTAATCGGATGGAGAGC        |                  |
| FLC_6838_R                                     | ACTCGGCAAGAAATTTGTG        |                  |
| Primers used for short RNA fragments detection |                            |                  |
| Primer                                         | Sequence 5'-3'             | Note             |
| sR1_F                                          | TTATTTGGTGTGAGAATTGGAT     |                  |
| sR2_F                                          | TGGAGATCTTGGTGTATGTG       |                  |
| sR3_F                                          | TGTTCTCACTTCTGTCAAAA       |                  |
| sR4_F                                          | TTGTGTTTGTCCACAGTGAA       |                  |
| sR5_F                                          | TGAAGAGCTACGGCTTATTT       |                  |
| sR6_F                                          | TTGCAACAGGAGCGTGGCT        |                  |
| sR7_F                                          | TCTCTCTCTCTCTCGCGGT        |                  |
| sR8_F                                          | TACTGCTTCAACTTAAAG         |                  |
| sR9_F                                          | TTAAACATAAAGAACACACAA      |                  |
| sR10_F                                         | TTATGAGAAATAGCTTCT         |                  |
| sR11_F                                         | TAATGGTTTATTGGTGGT         |                  |
| sR12_F                                         | TGAAAAGATATCCTGGAT         |                  |
| sR13_F                                         | TAGTGATTTGACCTATGAT        |                  |
| sR14_F                                         | TCGTACAGATGGGAATATC        |                  |
| sR15_F                                         | TGATGTGGAGCAAGCTGA         |                  |
| sR16_F                                         | TGGAGATGTCACTGCTGGAC       |                  |
| sR17_F                                         | TCTCCGAACTCTCCGGTGA        |                  |
| sR18_F                                         | TCTCCAGCTACTTAAATAGCC      |                  |
| sR18-1_F                                       | TCCCACTACTTAAATAGCC        |                  |
| sR18-2_F                                       | CCCACCTACTTAAATAGCC        |                  |
| sR18-3_F                                       | CCACTACTTAAATAGCC          |                  |
| sR18-4_F                                       | CACACTTAAATAGCC            |                  |
| sR18-5_F                                       | ACTACTTAAATAGCC            |                  |
| sR18-6_F                                       | CTACTTAAATAGCC             |                  |
| sR18-7_F                                       | TACTTAAATAGCC              |                  |
| sR18-8_F                                       | ACTTAAATAGCC               |                  |
| sR18-9_F                                       | CTTAAATAGCC                |                  |
| sR18-10_F                                      | TTAAATAGCC                 |                  |
| sR18-11_F                                      | TAATAGCC                   |                  |
| sR18-12_F                                      | AATAGCC                    |                  |
| sR18-13_F                                      | ATTAGCC                    |                  |
| sR18-14_F                                      | TAGCC                      |                  |
| sR18-15_F                                      | AGCC                       |                  |
| sR18-16_F                                      | GCC                        |                  |
| sR18-17_F                                      | CC                         |                  |
| sRNA_F                                         | TAGSACACTASACTGAAATC       |                  |

**Dataset S1 (separate file).** List of proteins identified by HPR1-GFP affinity purifications.
